# Supplementary material for: Intrapericardial Administration of Secretomes from Menstrual Blood-Derived Mesenchymal Stromal Cells: Effects on Immune-Related Genes in a Porcine Model of Myocardial Infarction
Source: MDPI journal article supplement (doi:10.3390/biomedicines10051117), 2022-05-11
Supplement: s1 [file s1]

# **Supplementary Materials**

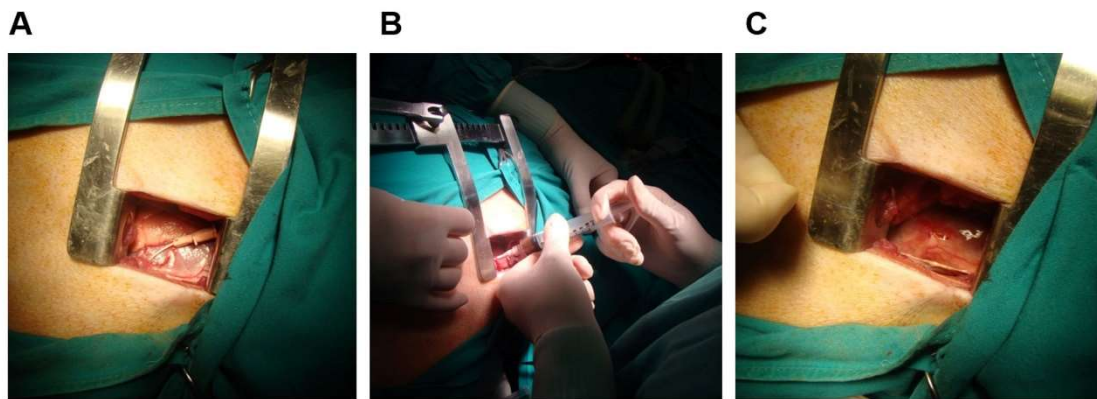

**Figure S1. Intrapericardial administration of the therapy.** (A) An Abbocath® was inserted into the pericardial space via a mini-thoracotomy. (B) The injection was performed slowly. (C) When needed, a 0/6 polypropylene suture was applied to the pericardium.

## Supplementary Materials

**Table S1.** List of top-ten abundant miRNAs in secretomes from MenSCs cultured under standard culture conditions (A) and prime with IFN $\gamma$ /TNF $\alpha$  (B). Counts per million in a Next-Generation Sequencing analysis.

**A**

| miRNAs          | MenSC01 | MenSC02 | MenSC03 | Mean   | SD    |
|-----------------|---------|---------|---------|--------|-------|
| hsa-miR-143-3p  | 126452  | 69402   | 153649  | 116501 | 42996 |
| hsa-miR-12136   | 50103   | 89693   | 70610   | 70136  | 19799 |
| hsa-let-7b-5p   | 41554   | 113086  | 51489   | 68710  | 38750 |
| hsa-miR-199a-3p | 53483   | 60355   | 47802   | 53880  | 6286  |
| hsa-miR-21-5p   | 43145   | 24039   | 46709   | 37964  | 12191 |
| hsa-let-7a-5p   | 30420   | 47173   | 36056   | 37883  | 8525  |
| hsa-miR-29a-3p  | 18093   | 36704   | 37422   | 30740  | 10958 |
| hsa-let-7f-5p   | 29426   | 24943   | 27452   | 27274  | 2246  |
| hsa-let-7i-5p   | 22467   | 15767   | 23081   | 20439  | 4057  |
| hsa-miR-27a-5p  | 18491   | 4653    | 26496   | 16546  | 11051 |

**B**

| miRNAs          | MenSC*01 | MenSC*02 | MenSC*03 | Mean   | SD    |
|-----------------|----------|----------|----------|--------|-------|
| hsa-miR-199a-3p | 143125   | 174179   | 139845   | 152383 | 18947 |
| hsa-miR-143-3p  | 118695   | 47687    | 129049   | 98477  | 44289 |
| hsa-miR-29a-3p  | 80038    | 74413    | 81931    | 78794  | 3910  |
| hsa-miR-221-3p  | 13448    | 143693   | 29323    | 62155  | 71059 |
| hsa-miR-21-5p   | 106025   | 24136    | 53797    | 61320  | 41459 |
| hsa-let-7i-5p   | 71519    | 61377    | 38244    | 57047  | 17055 |
| hsa-miR-27b-3p  | 25598    | 66848    | 37878    | 43441  | 21180 |
| hsa-miR-27a-3p  | 89853    | 22380    | 15828    | 42687  | 40978 |
| hsa-let-7b-5p   | 21015    | 65317    | 39021    | 41784  | 22280 |
| hsa-let-7f-5p   | 36365    | 37893    | 27082    | 33780  | 5851  |

## Supplementary Materials

**Table S2.** Assays ID of commercial TaqMan Gene Expression Assays.

| Gene Symbol | Assay ID      |
|-------------|---------------|
| BMP6        | Ss04245858_m1 |
| CXCR6       | Ss03818556_s1 |
| ACKR2       | Ss04953541_s1 |
| LIF         | Ss03391458_m1 |
| STAT3       | Ss03388426_m1 |
| APOE        | Ss03394681_m1 |
| TFRC        | Ss03391240_m1 |
| THBS1       | Ss03373620_m1 |
| BCL6        | Ss04955003_m1 |
| CDC42       | Ss03388722_m1 |
| IGF1R       | Ss03394281_m1 |
| RPS3        | Ss01037177_g1 |
